# Supplementary material for: Effects and mechanisms of prolongevity induced by Lactobacillus gasseri SBT2055 in Caenorhabditis elegans
Source: PubMed Central journal article supplement (PMC4783334; doi:10.1111/acel.12431), 2015-12-29

a)

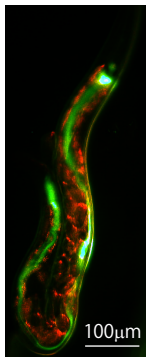

b)

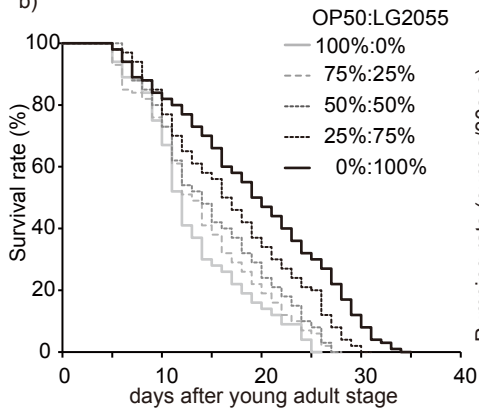

c)

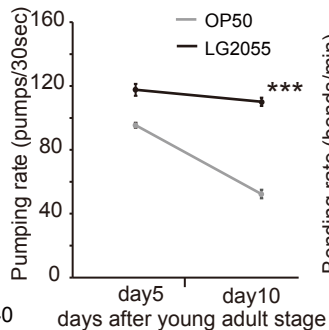

d)

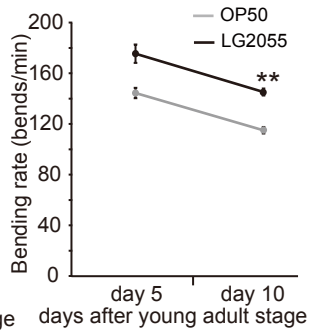

e)

OP50 day15

LG2055 day15

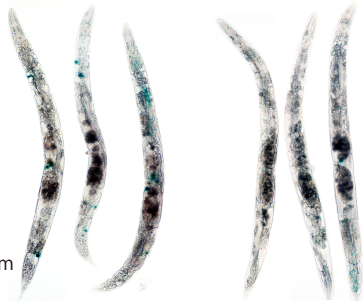

f)

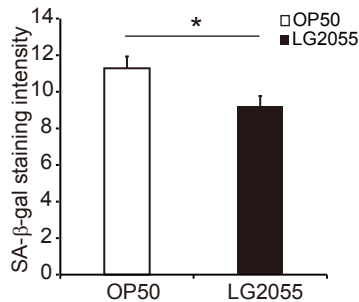

g)

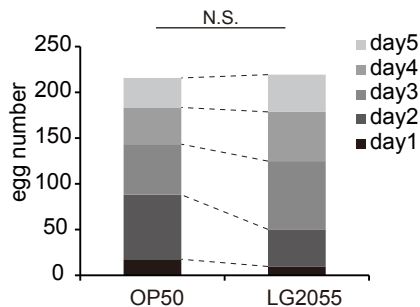

Supplement: ACEL-15-227-s001.pdf [file ACEL-15-227-s001.pdf]
