# Supplementary material for: Effects and mechanisms of prolongevity induced by Lactobacillus gasseri SBT2055 in Caenorhabditis elegans
Source: PubMed Central journal article supplement (PMC4783334; doi:10.1111/acel.12431), 2015-12-29

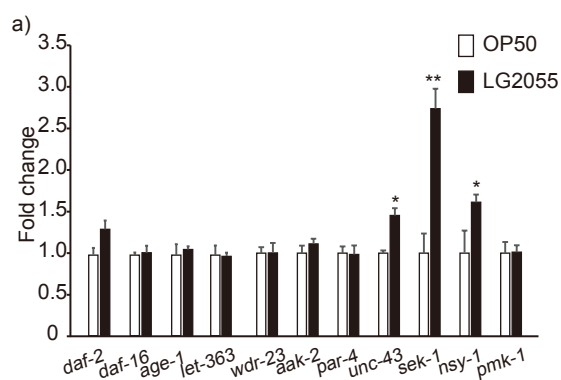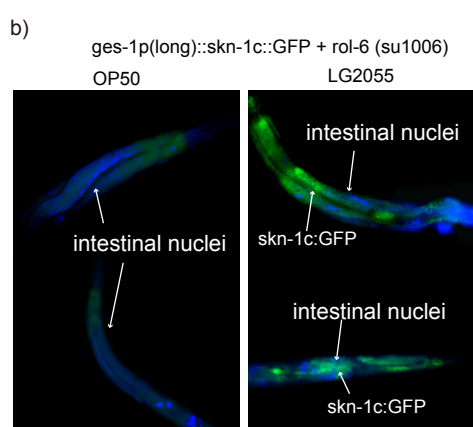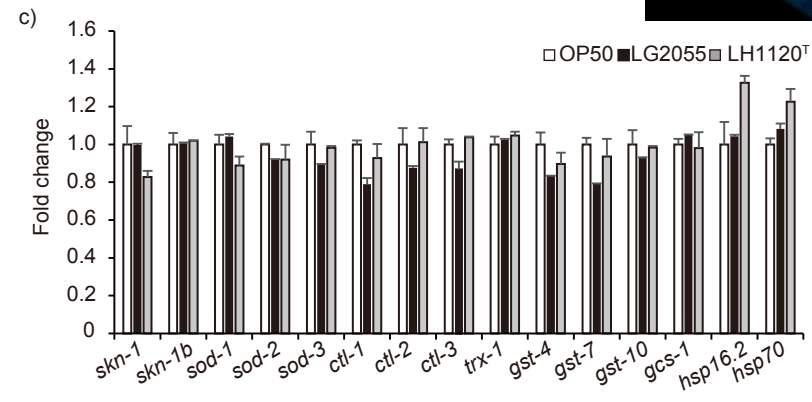

Supplement: ACEL-15-227-s002.pdf [file ACEL-15-227-s002.pdf]
